# Supplementary material for: DEK Is a Potential Biomarker Associated with Malignant Phenotype in Gastric Cancer Tissues and Plasma
Source: MDPI journal article supplement (doi:10.3390/ijms20225689), 2019-11-13
Supplement: s1 [file s1]

## Supplemental Figure and Tables

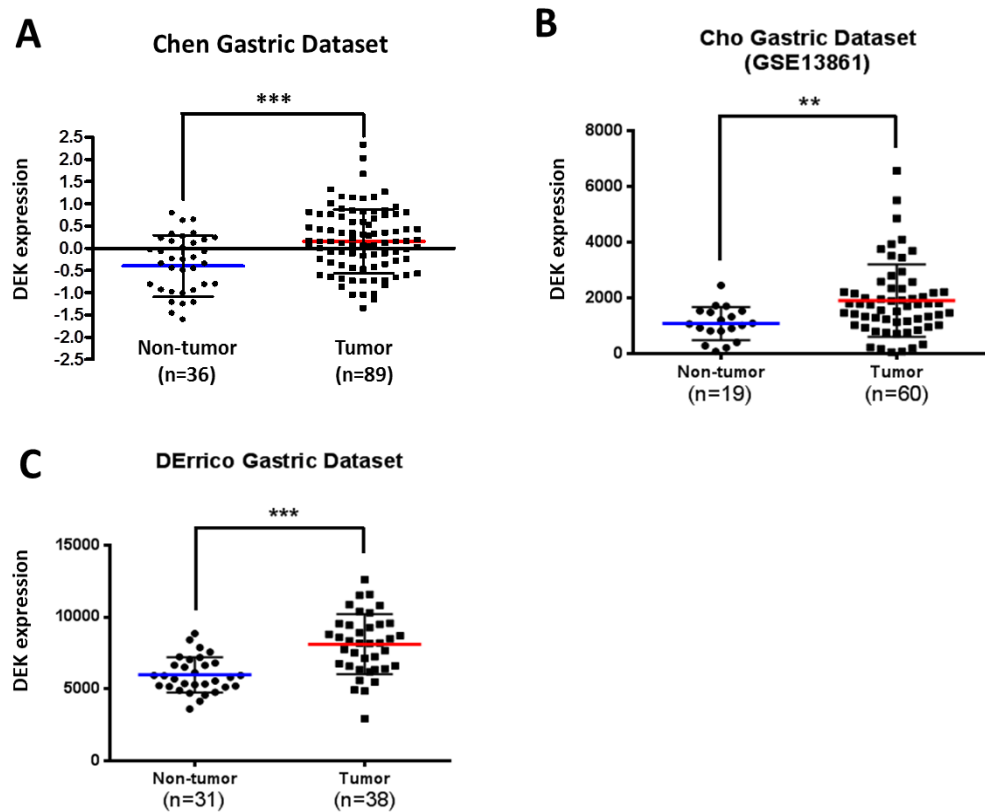

**Figure S1.** DEK expression is significantly increased in GC tissue according to the Oncomine database. Scatter plots of DEK expression in GC and adjacent normal tissues (n=72) determined via qRT-PCR. Error bars indicate standard deviations. **(A)** Chen Gastric Dataset, **(B)** Cho Gastric Dataset, **(C)** DErrico Gastric Dataset. Statistical analysis was performed using the Mann-Whitney U test (\*,  $p < 0.01$ , \*\*,  $p < 0.05$ , \*\*\*,  $p < 0.001$ ).

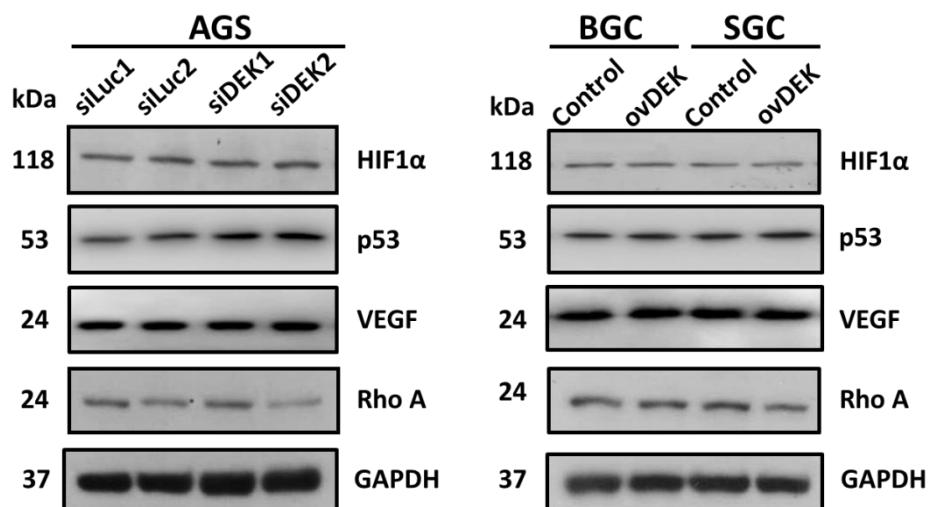

**Figure S2.** p53, VEGF, HIF-1 $\alpha$  and RhoA expression levels in stably expressing knockdown or overexpression DEK GC cell lines. **(A)** Total cell lysates from knockdown of DEK of the AGS cell line. Cell lysates were prepared and the extracted proteins (50  $\mu$ g) analyzed by western blot. **(B)** Overexpression of DEK in BGC and SGC cells. Cell lysates were prepared, and the extracted proteins (50  $\mu$ g) analyzed by western blot. GAPDH served as an internal control.

**Table S1.** Comparison of the adjacent nontumor mucosa and the tumor tissue; the iTRAQ study of DEK expression in GC patients.

|               | GC1                | GC2  | GC3  | GC4                | GC5  | GC6  | Mean |
|---------------|--------------------|------|------|--------------------|------|------|------|
| Lauren's type | Int. <sup>a)</sup> | Int. | Int. | Dif. <sup>b)</sup> | Dif. | Dif. |      |
| DEK T/N Ratio | 1.88               | 2.02 | 3.93 | 1                  | 1.04 | 1.76 | 1.94 |

a) Int. : intestinal type

b) Dif. : diffuse type

**Table S2.** AUCs of two combined plasma biomarkers of DEK, CEA, CA19.9 and CRP in 98 GC patients and 120 healthy controls by ROC analysis.

| Combined biomarkers | AUC   | SE <sup>a)</sup> | Asymptotic significance <sup>b)</sup> |
|---------------------|-------|------------------|---------------------------------------|
| DEK+CEA             | 0.855 | 0.026            | <0.0001                               |
| DEK+CA19.9          | 0.802 | 0.031            | <0.0001                               |
| DEK+CRP             | 0.796 | 0.031            | <0.0001                               |
| CEA+CRP             | 0.788 | 0.032            | <0.0001                               |
| CEA+CA19.9          | 0.774 | 0.032            | <0.0001                               |
| CA19.9+CRP          | 0.628 | 0.040            | 0.002                                 |

a) Under the nonparametric assumption

b) Null hypothesis: true area = 0.5 (The area under the diagonal line)

**Table S3.** Comparisons (*p* value) of AUCs between DEK alone and combined markers in preoperative diagnosis.

| DEK alone vs Combined | <i>p</i> value <sup>a)</sup> |
|-----------------------|------------------------------|
| DEK vs DEK+CEA        | 0.1483                       |
| DEK vs DEK+CA19.9     | 0.9089                       |

|                |        |
|----------------|--------|
| DEK vs DEK+CRP | 0.9819 |
|----------------|--------|

a) *P* value: by online calculator: “comparison of Two ROC Curves – VassarStats”
